# Supplementary material
Source: MDPI journal article supplement (https://www.mdpi.com/1424-8247/15/9/1090)
Supplement: s1 [file s1]

**Supplementary Table S1:**

IDO1, IDO2 and TDO2 expression in 49 New Zealand melanoma lines before and 72 h after induction with human IFN $\gamma$ .

| CellLine | IDO1        |              | IDO2        |              | TDO2        |              |
|----------|-------------|--------------|-------------|--------------|-------------|--------------|
|          | Non Induced | IFN $\gamma$ | Non Induced | IFN $\gamma$ | Non Induced | IFN $\gamma$ |
| NZM 1    | -           | -            | -           | -            | -           | -            |
| NZM 2    | -           | -            | -           | -            | -           | -            |
| NZM 3    | -           | +            | -           | -            | -           | -            |
| NZM 4    | -           | +            | -           | -            | -           | -            |
| NZM 9    | -           | +            | -           | -            | -           | -            |
| NZM 12   | -           | +            | -           | -            | -           | -            |
| NZM 13   | -           | +            | -           | -            | -           | -            |
| NZM 14   | -           | +            | -           | -            | -           | -            |
| NZM 16   | -           | +            | -           | -            | -           | -            |
| NZM 17   | -           | +            | -           | -            | -           | -            |
| NZM 18   | -           | +            | -           | -            | -           | -            |
| NZM 19   | -           | +            | -           | -            | -           | -            |
| NZM 20   | -           | +            | -           | -            | -           | -            |
| NZM 21   | -           | +            | -           | -            | -           | -            |
| NZM 22   | -           | +            | -           | -            | -           | -            |
| NZM 23   | -           | -            | -           | -            | -           | -            |
| NZM 24   | -           | -            | -           | -            | -           | -            |
| NZM 26   | -           | +            | -           | -            | -           | -            |
| NZM 27   | -           | +            | -           | -            | -           | -            |
| NZM 28   | -           | +            | -           | -            | -           | -            |
| NZM 29   | -           | +            | -           | -            | -           | -            |
| NZM 30   | -           | +            | -           | -            | -           | -            |
| NZM 33   | -           | +            | -           | -            | -           | -            |
| NZM 37   | -           | +            | -           | -            | -           | -            |
| NZM 38   | -           | +            | -           | -            | -           | -            |
| NZM 39   | -           | +            | -           | -            | -           | -            |
| NZM 42   | -           | +            | -           | -            | -           | -            |
| NZM 43   | -           | +            | -           | -            | -           | -            |
| NZM 44   | -           | +            | -           | -            | -           | -            |
| NZM 45   | -           | +            | -           | -            | -           | -            |
| NZM 47   | -           | +            | -           | -            | -           | -            |
| NZM 48   | -           | +            | -           | -            | -           | -            |
| NZM 49   | -           | +            | -           | -            | -           | -            |
| NZM 51   | -           | +            | -           | -            | -           | -            |
| NZM 52   | -           | +            | -           | -            | -           | -            |
| NZM 53   | -           | +            | -           | -            | -           | -            |
| NZM 54   | -           | +            | -           | -            | -           | -            |
| NZM 55   | -           | +            | -           | -            | -           | -            |
| NZM 56   | -           | -            | -           | -            | -           | -            |
| NZM 57   | -           | +            | -           | -            | -           | -            |
| NZM 58   | -           | +            | -           | -            | -           | -            |
| NZM 59   | -           | +            | -           | -            | -           | -            |
| NZM 60   | -           | +            | -           | -            | -           | -            |
| NZM 61   | -           | +            | -           | -            | -           | -            |
| NZM 67   | -           | +            | -           | -            | -           | -            |
| NZM 71   | -           | -            | -           | -            | -           | -            |
| NZM 72   | -           | +            | -           | -            | -           | -            |
| NZM 78   | -           | +            | -           | -            | -           | -            |
| NZM 79   | -           | -            | -           | -            | -           | -            |
